# Supplementary material for: Cytotoxicity Study of Cyclopentapeptide Analogues of Marine Natural Product Galaxamide towards Human Breast Cancer Cells
Source: Oxid Med Cell Longev. 2017 Dec 19;2017:8392035. doi: 10.1155/2017/8392035 (PMC5749289; doi:10.1155/2017/8392035)
Supplement: Supplementary Materials — Spectral data. S-2: 1H and 13C NMR spectra of compound 1. S-3: ESI Mass Spectrum (Positive and negative mode) of compound 1. S-4: 1H and 13C NMR spectra of compound 2. S-5: ESI Mass Spectrum (Positive and negative mode) of compound 2. S-6: 1H and 13C NMR spectra of compound 3. S-7: ESI Mass Spectrum (Positive and negative mode) of compound 3. [file 8392035.f1.docx]

**Cytotoxicity Study of Cyclo-pentapeptide Analogues of Marine Natural Product Galaxamide towards Human Breast Cancer Cells**

Jignesh Lunagariya1#, Xiaojian Liao1#, Weili Long1, Shenghui Zhong1, Poonam Bhadja2, Hangbin Li1, Shihai Xu1*, Bingxin Zhao1*

1Department of Chemistry, Life Science School, Jinan University, Guangzhou 510632, China

2Institute of Biomineralization and Lithiasis Research, Jinan University, Guangzhou 510632, China

**Supporting Information**

**Spectral data**

1H and 13C NMR spectra of **compound 1** S-2

ESI Mass Spectrum (Positive and negative mode) of **compound 1** S-3

1H and 13C NMR spectra of **compound 2** S-4

ESI Mass Spectrum (Positive and negative mode) of **compound 2** S-5

1H and 13C NMR spectra of **compound 3** S-6

ESI Mass Spectrum (Positive and negative mode) of **compound 3** S-7

**Compound 1**

1H NMR

13C NMR

ESI Mass

Positive mode

Negative mode

**Compound 2**

1H NMR

13C NMR

ESI Mass

Positive mode

Negative mode

**Compound 3**

1H NMR

13C NMR

ESI Mass

Positive mode

Negative mode
